# Supplementary material for: Drugs of abuse hijack a mesolimbic pathway that processes homeostatic need
Source: PubMed Central journal article supplement — bioRxiv. 2023 Sep 5:2023.09.03.556059. Preprint. [Version 1] doi: 10.1101/2023.09.03.556059 (PMC10508763; doi:10.1101/2023.09.03.556059), 2023-09-05

# Figure S1

**a**

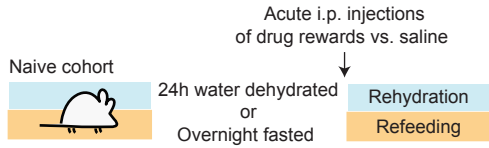

**b**

Acute exposure of cocaine vs. morphine

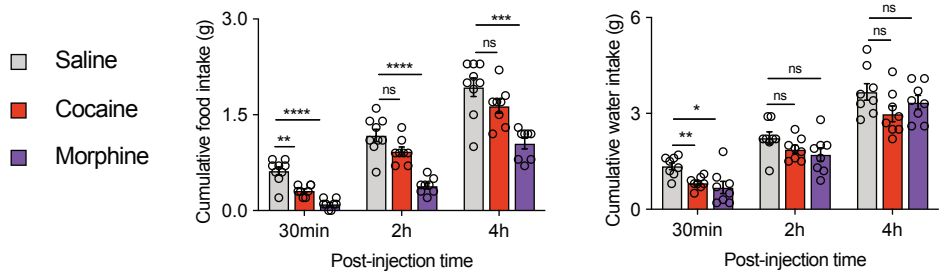

**c**

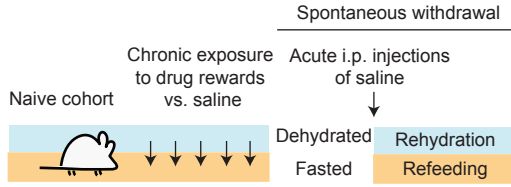

**d**

Spontaneous withdrawal from chronic exposure of cocaine vs. morphine

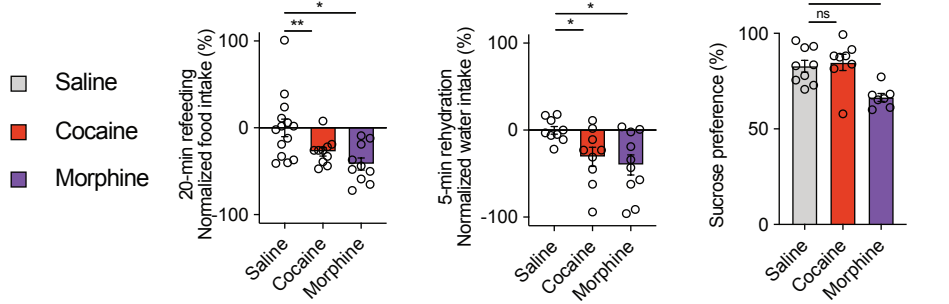

**e**

Brain-wide c-Fos activity mapping

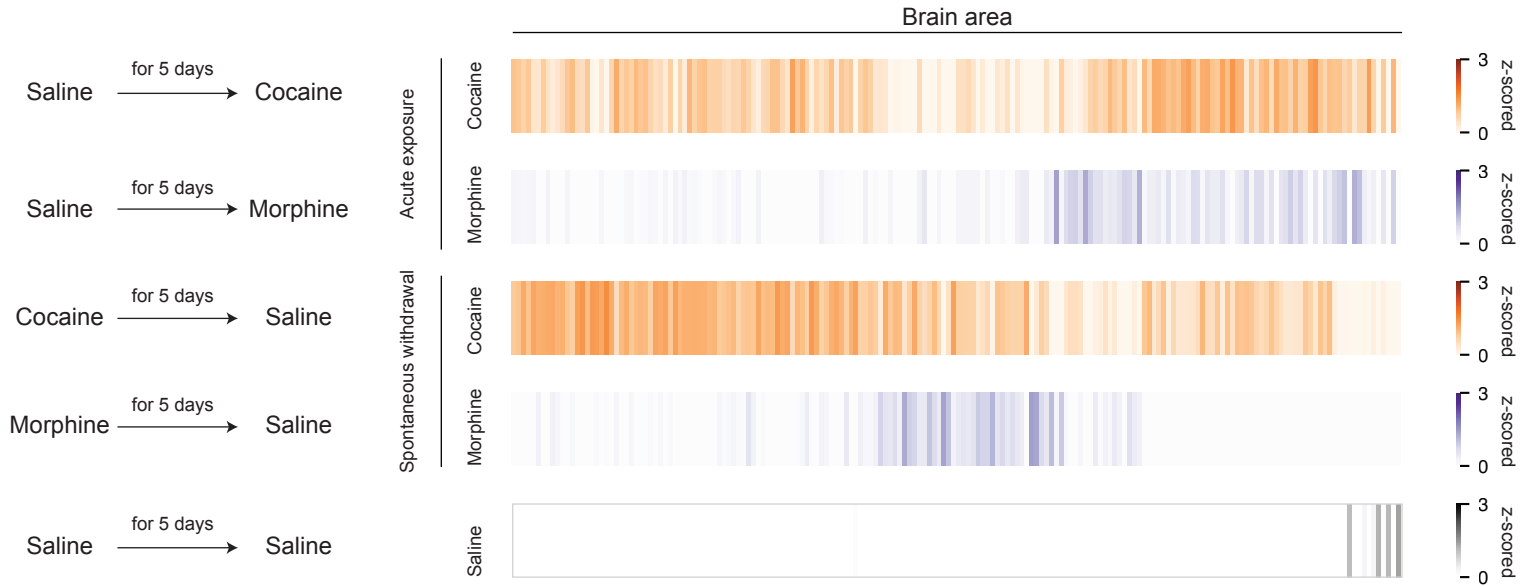

**f**

Acute exposure

Spontaneous withdrawal

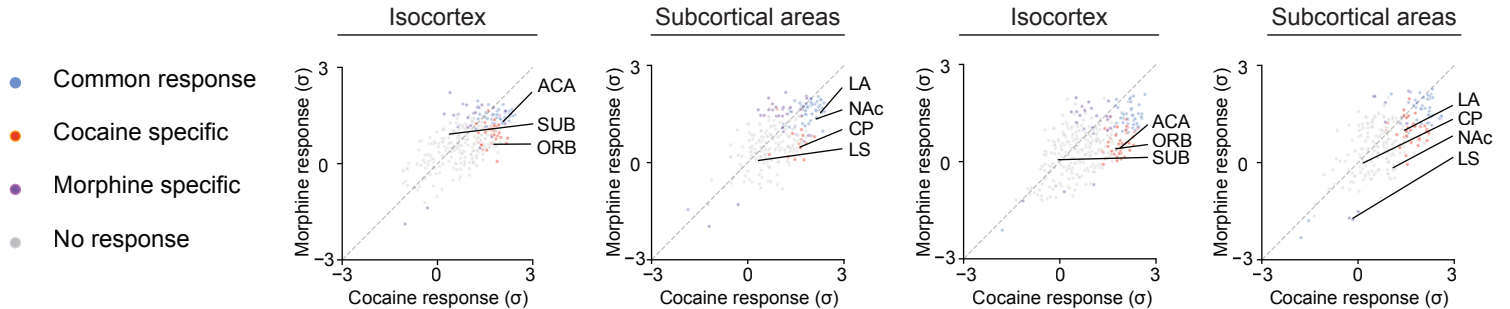

## Figure S2

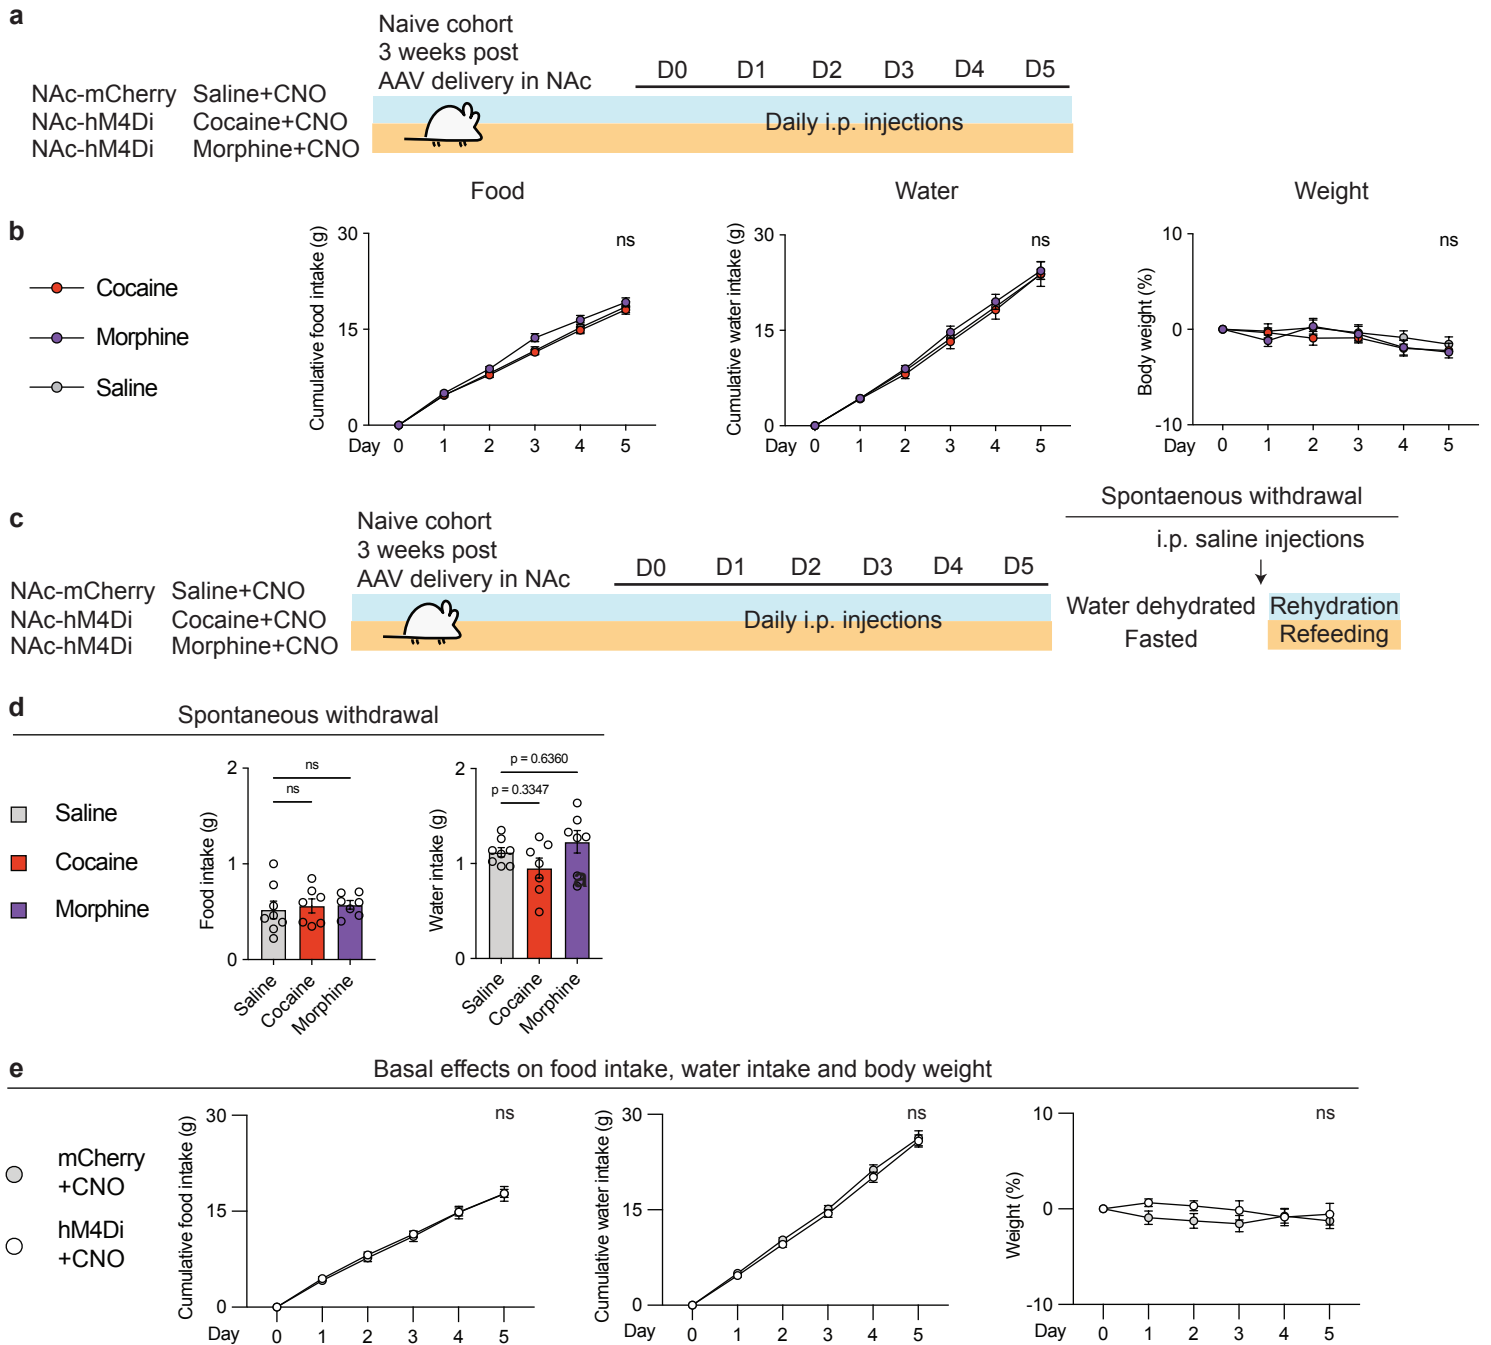

# Figure S3

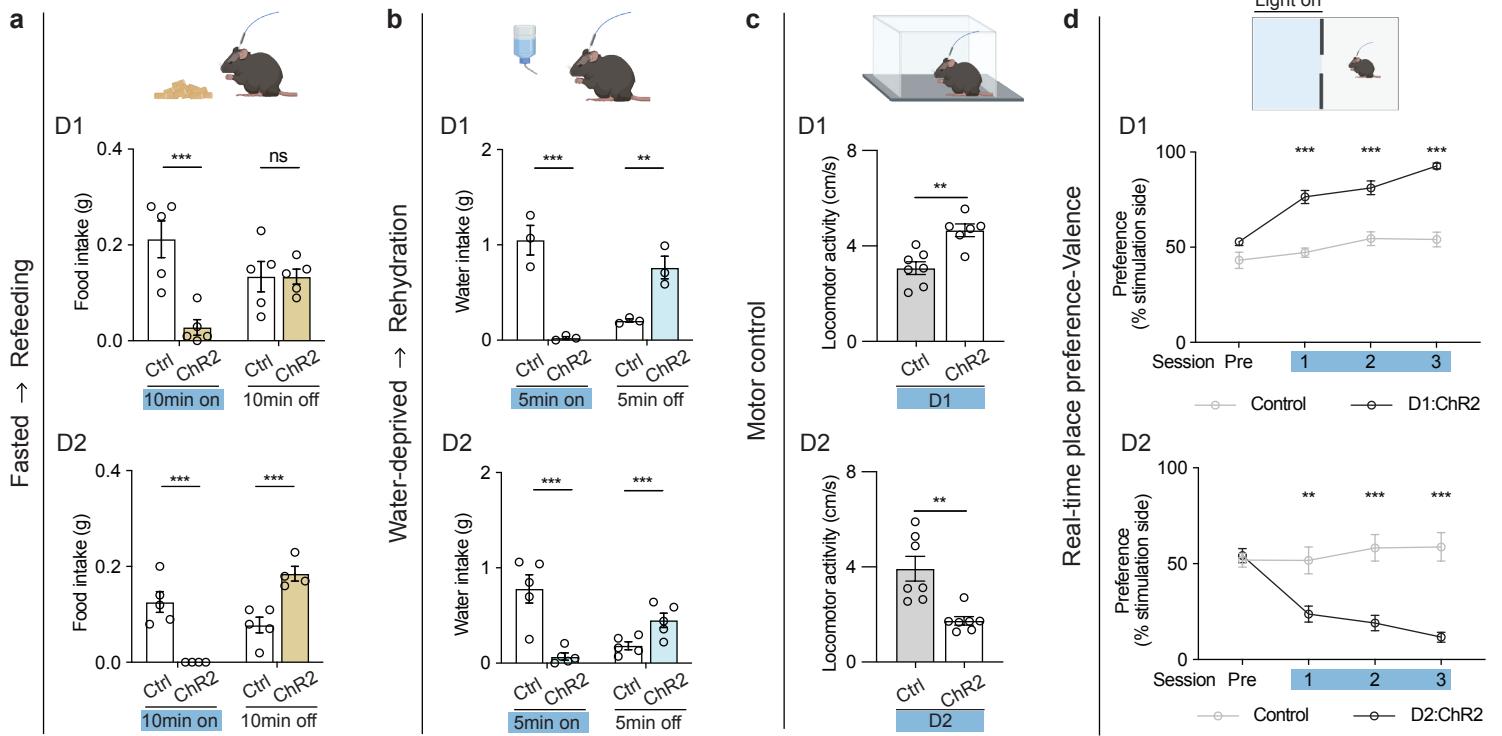

# Figure S4

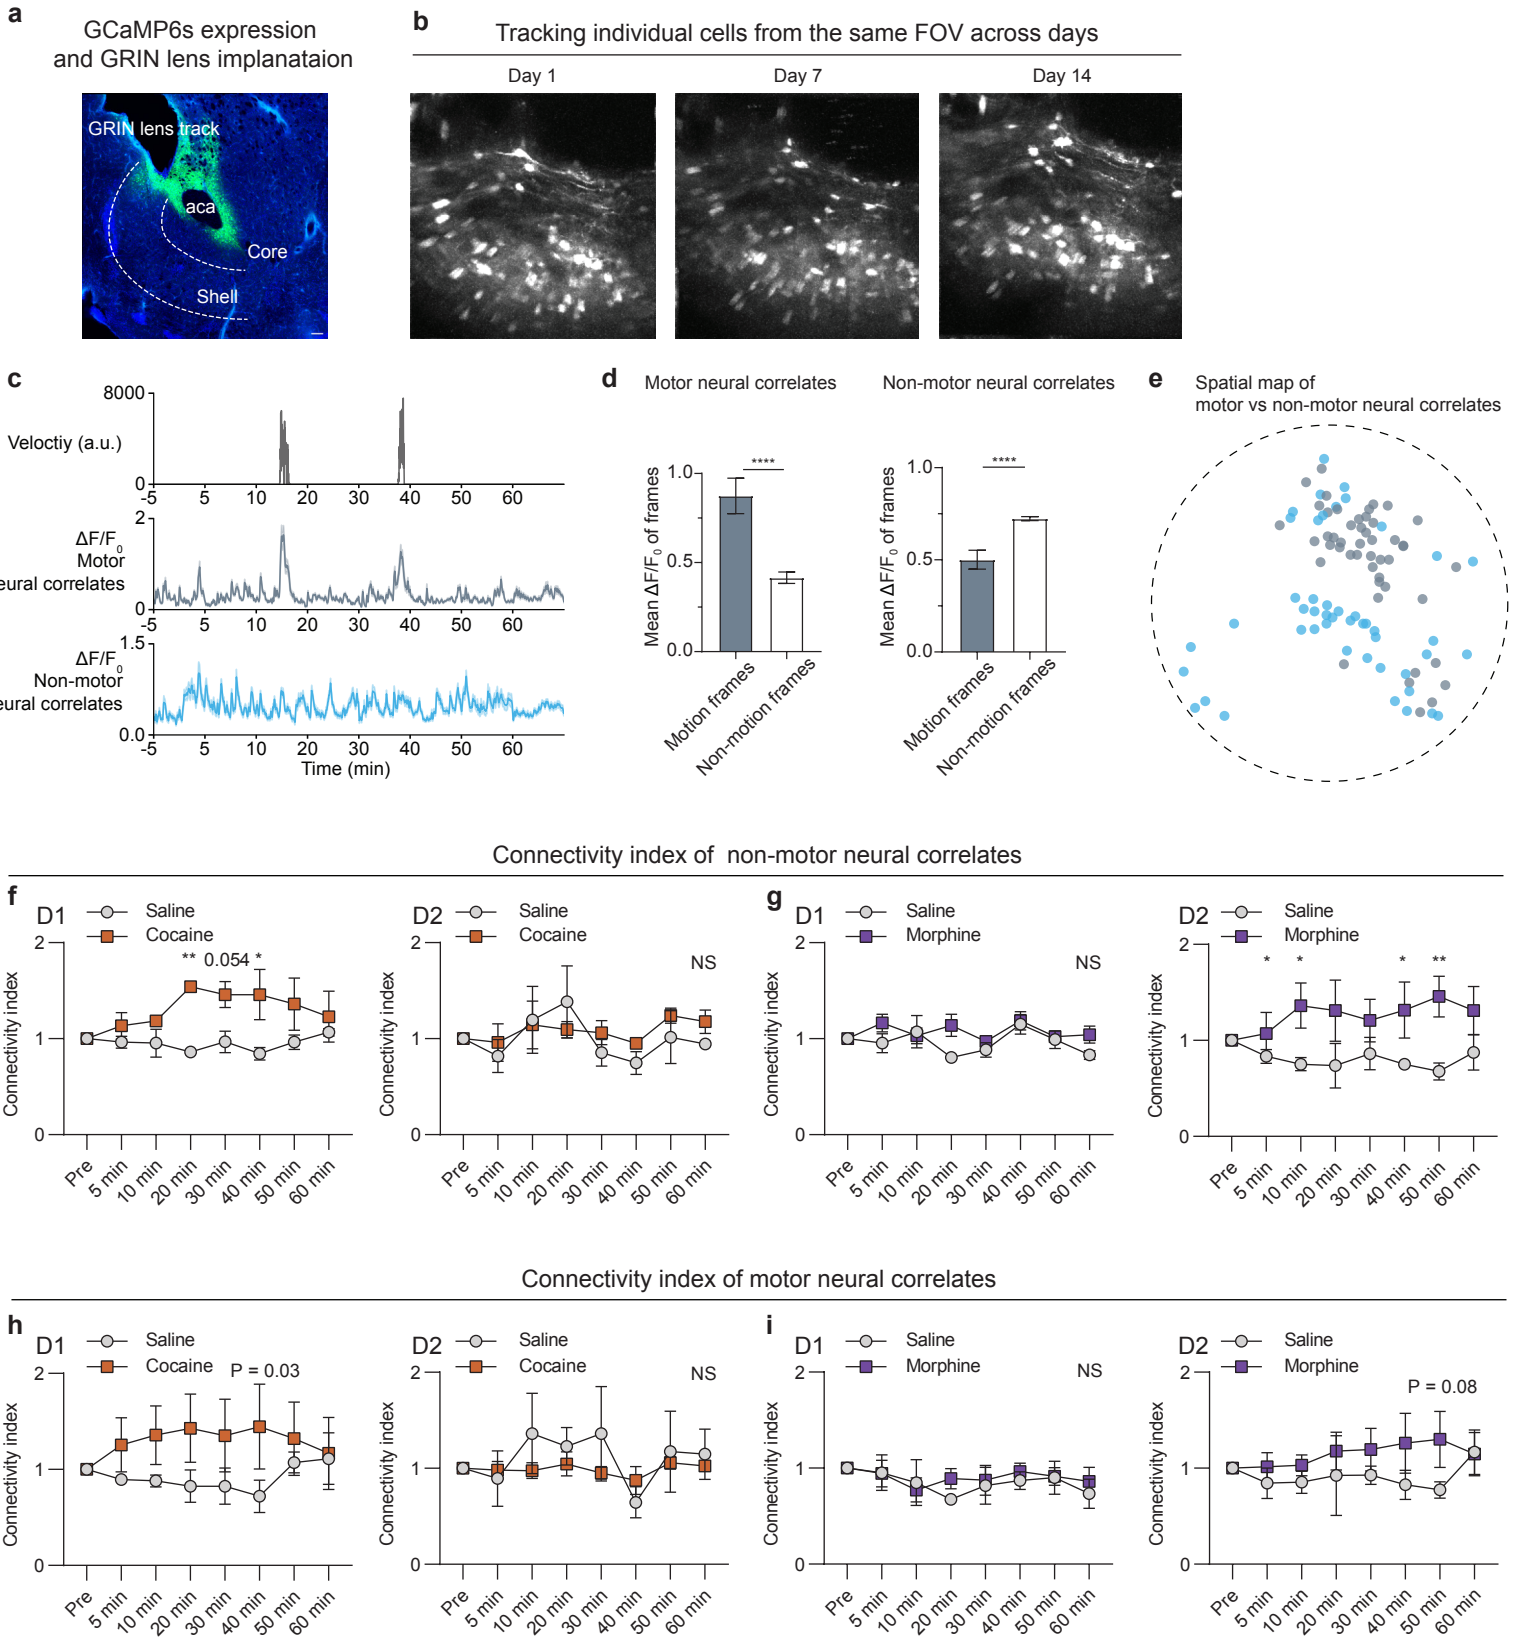

# Figure S5

Distribution of PCCs  
( $\mu = 0.04$ ,  $\sigma = 0.15$ )

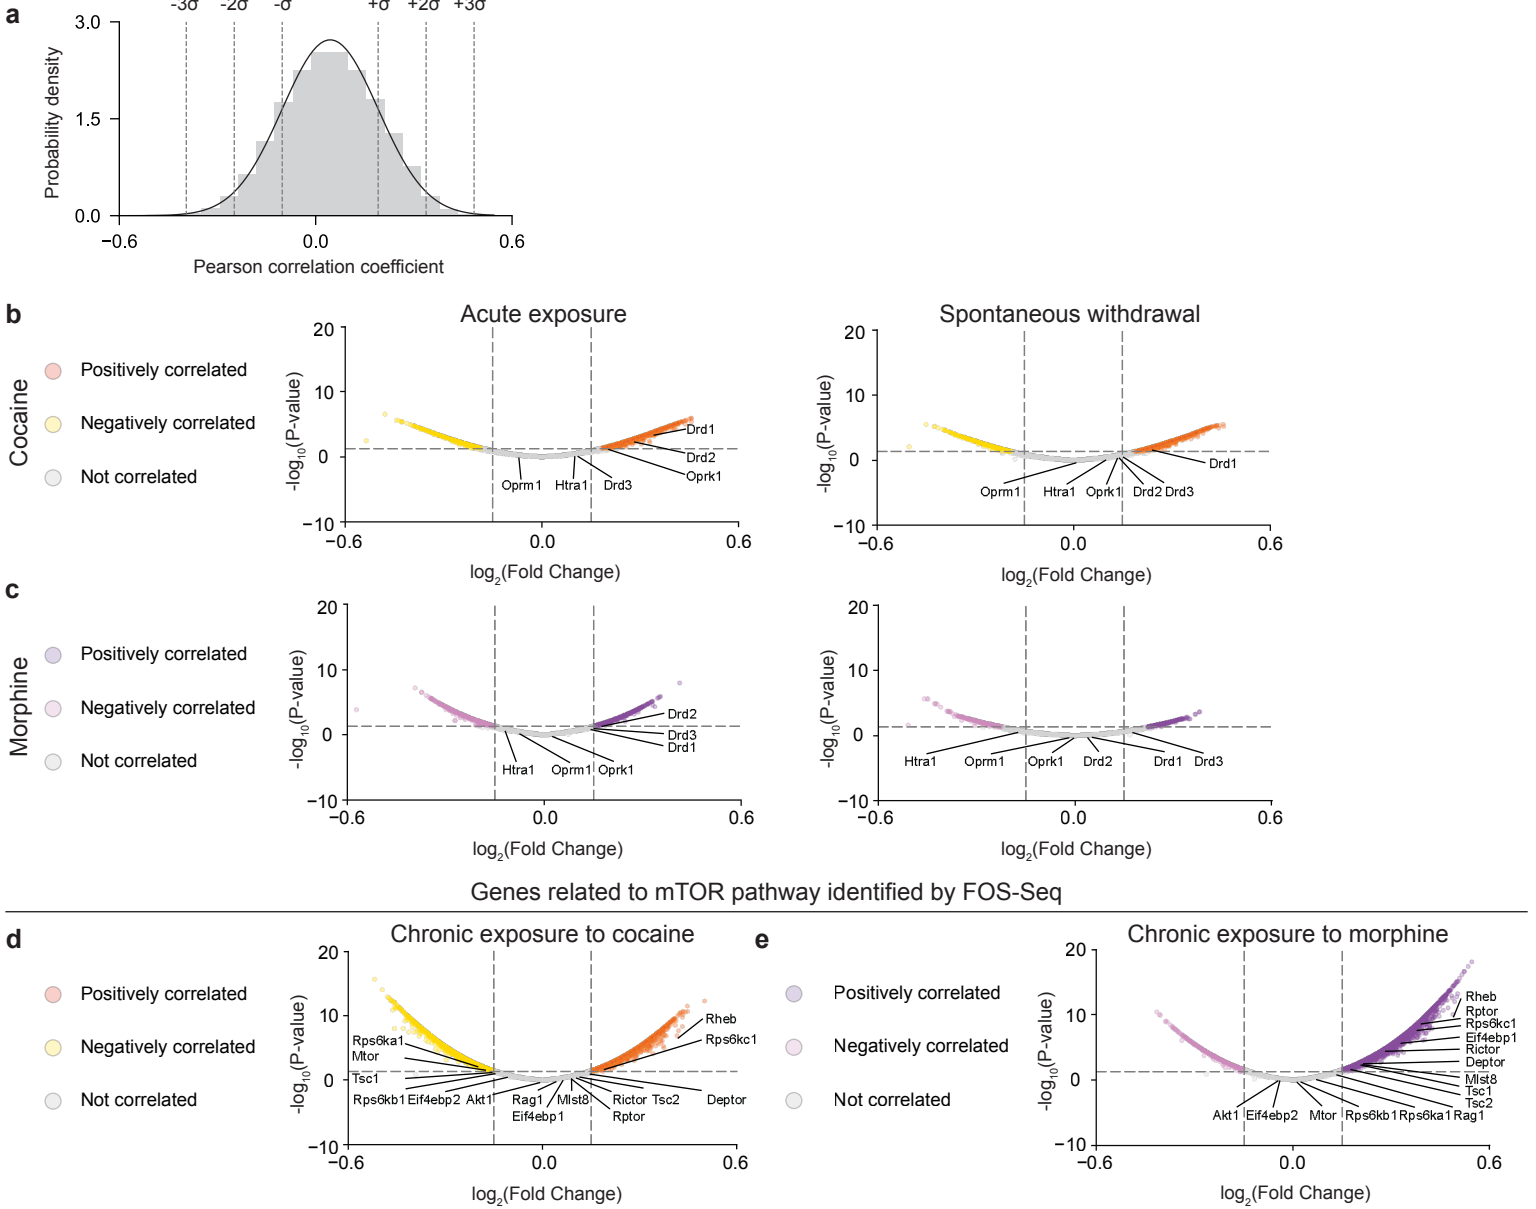

# Figure S6

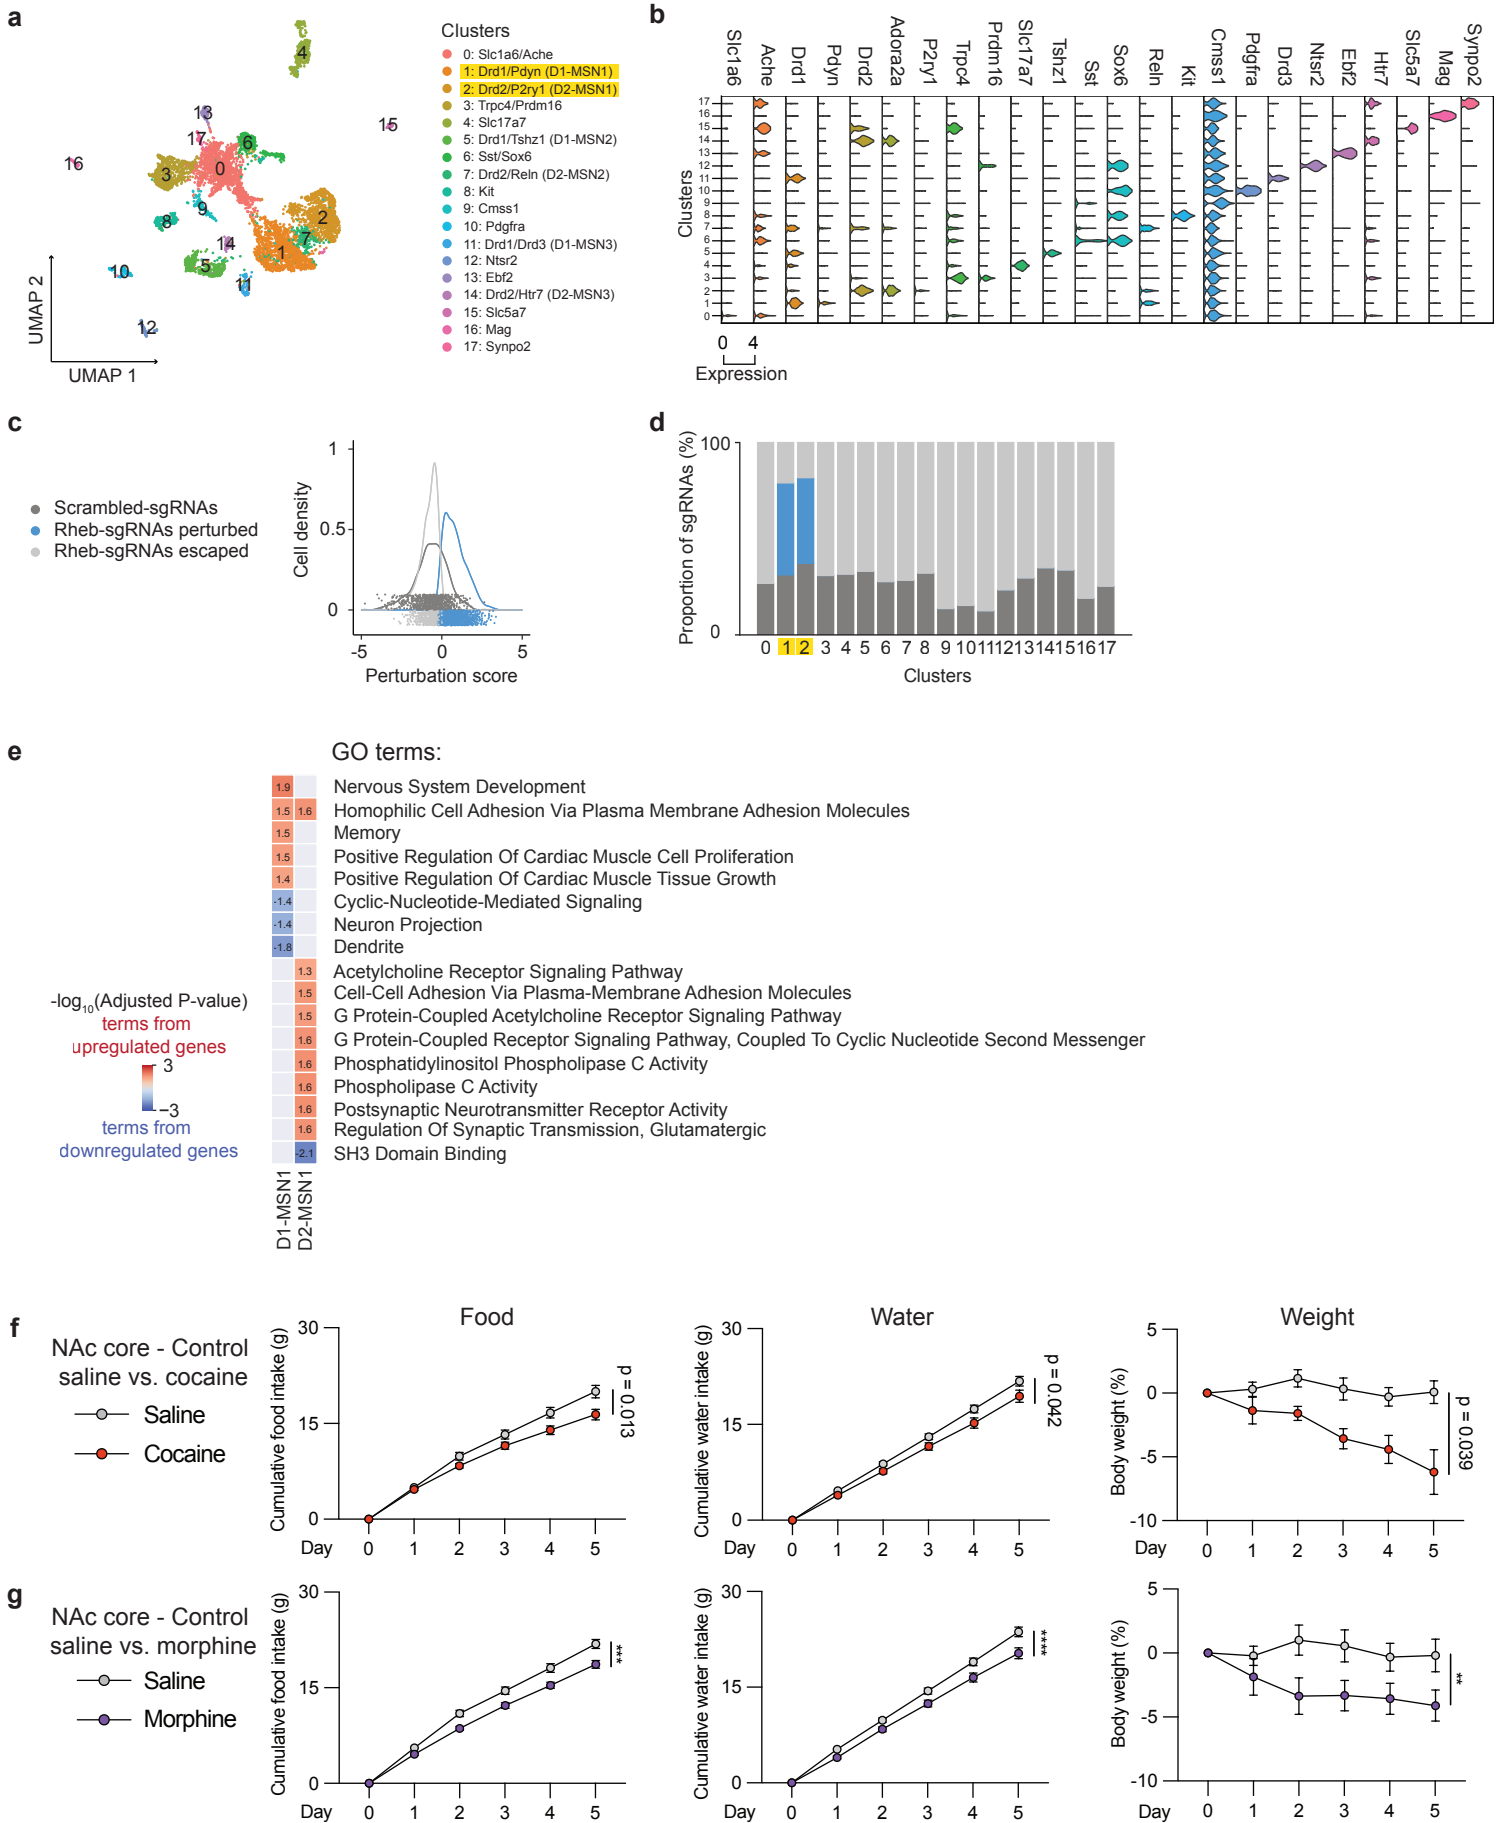

# Figure S7

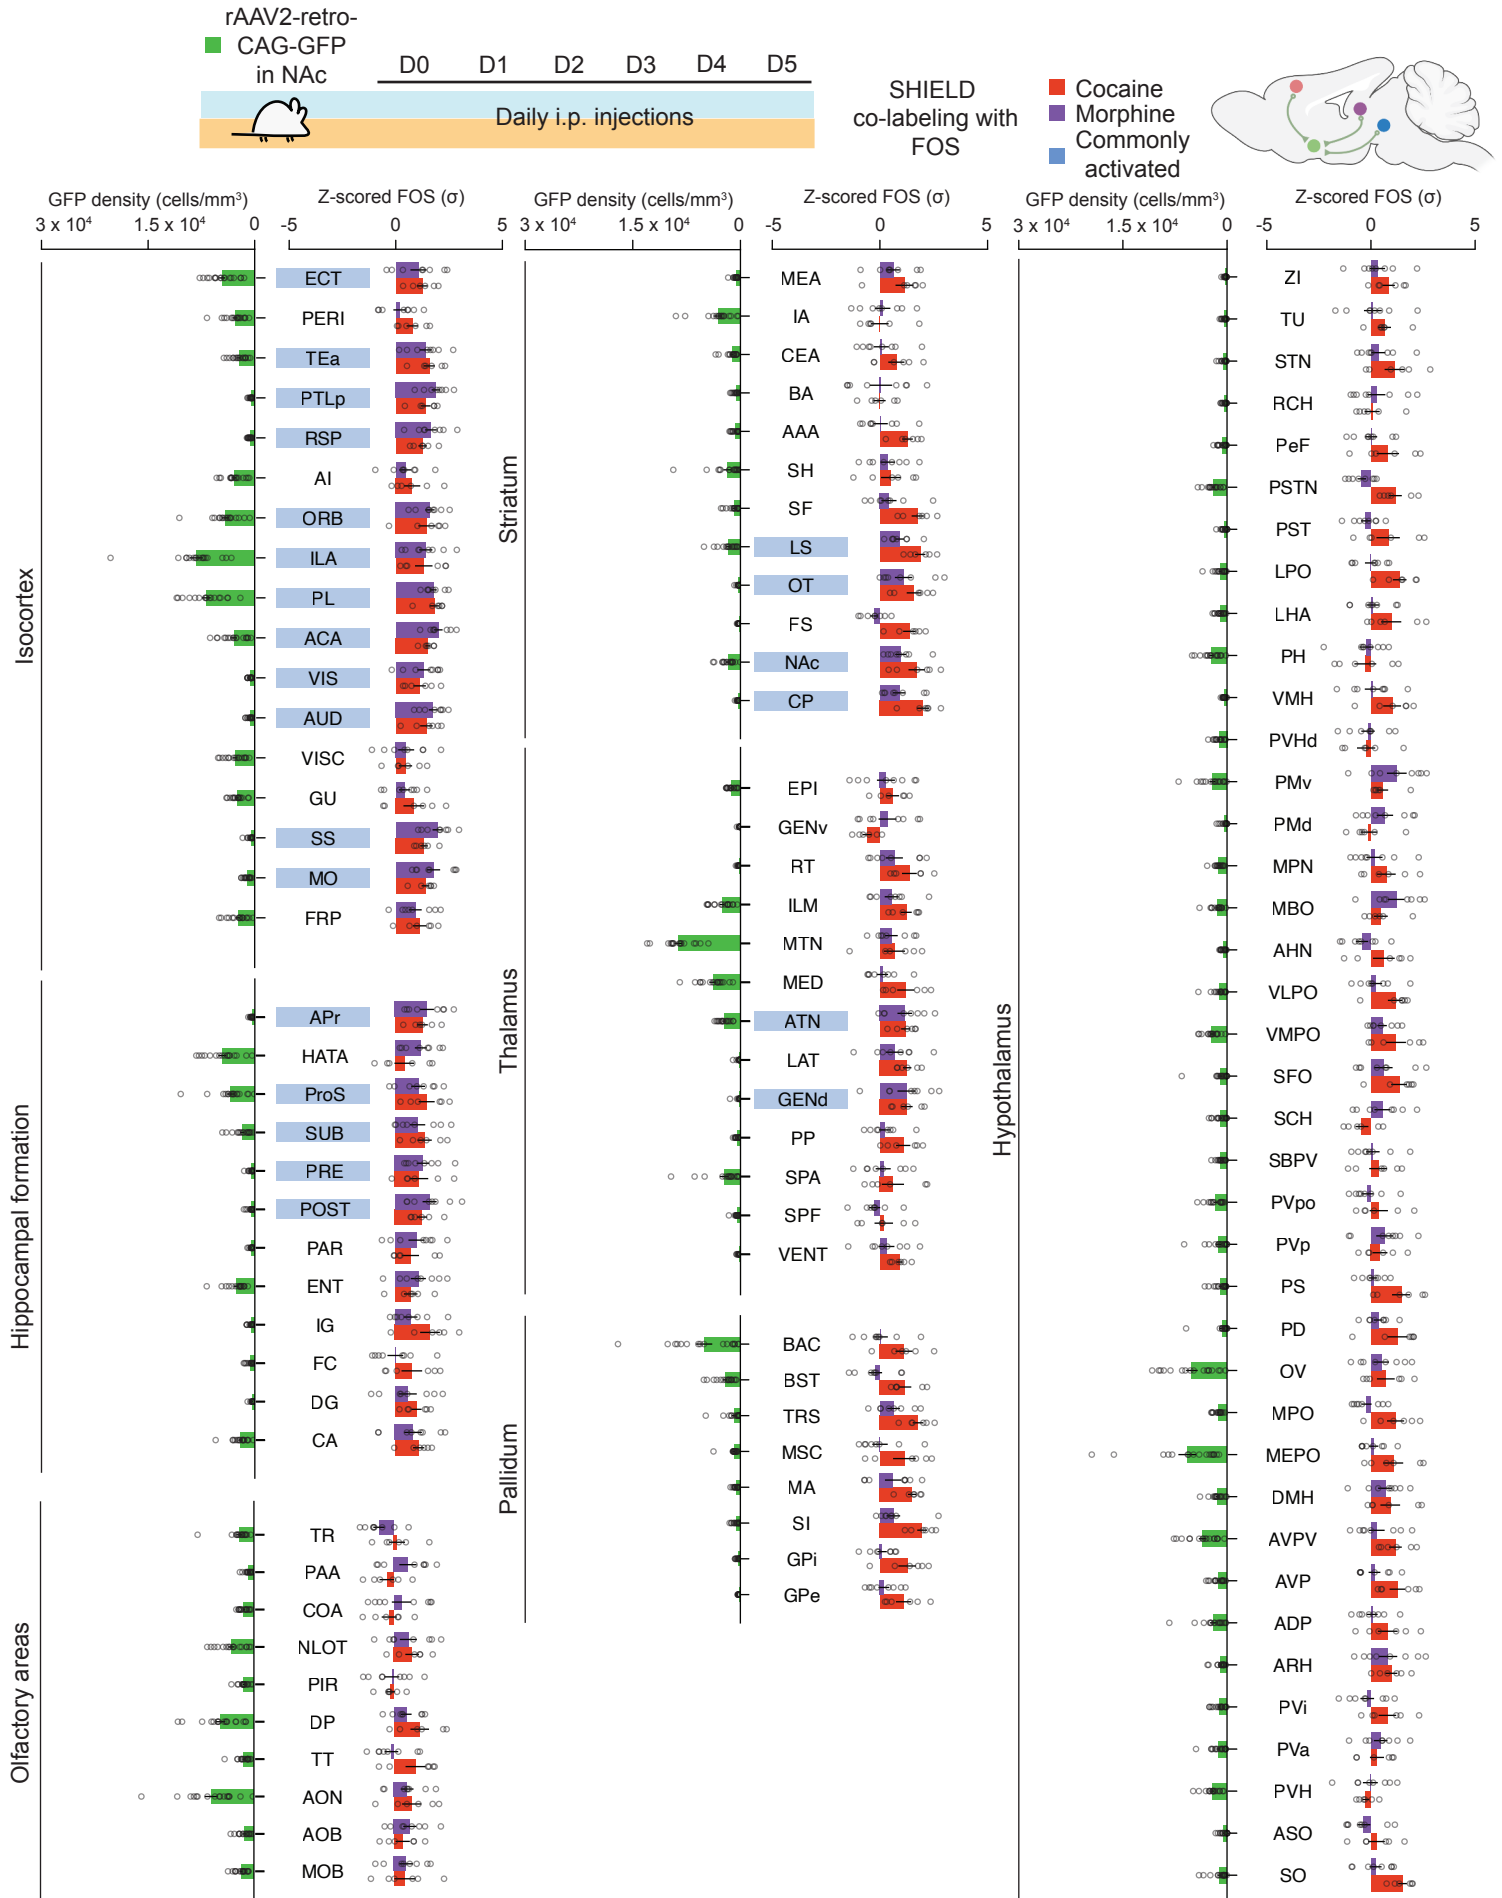

# Figure S8

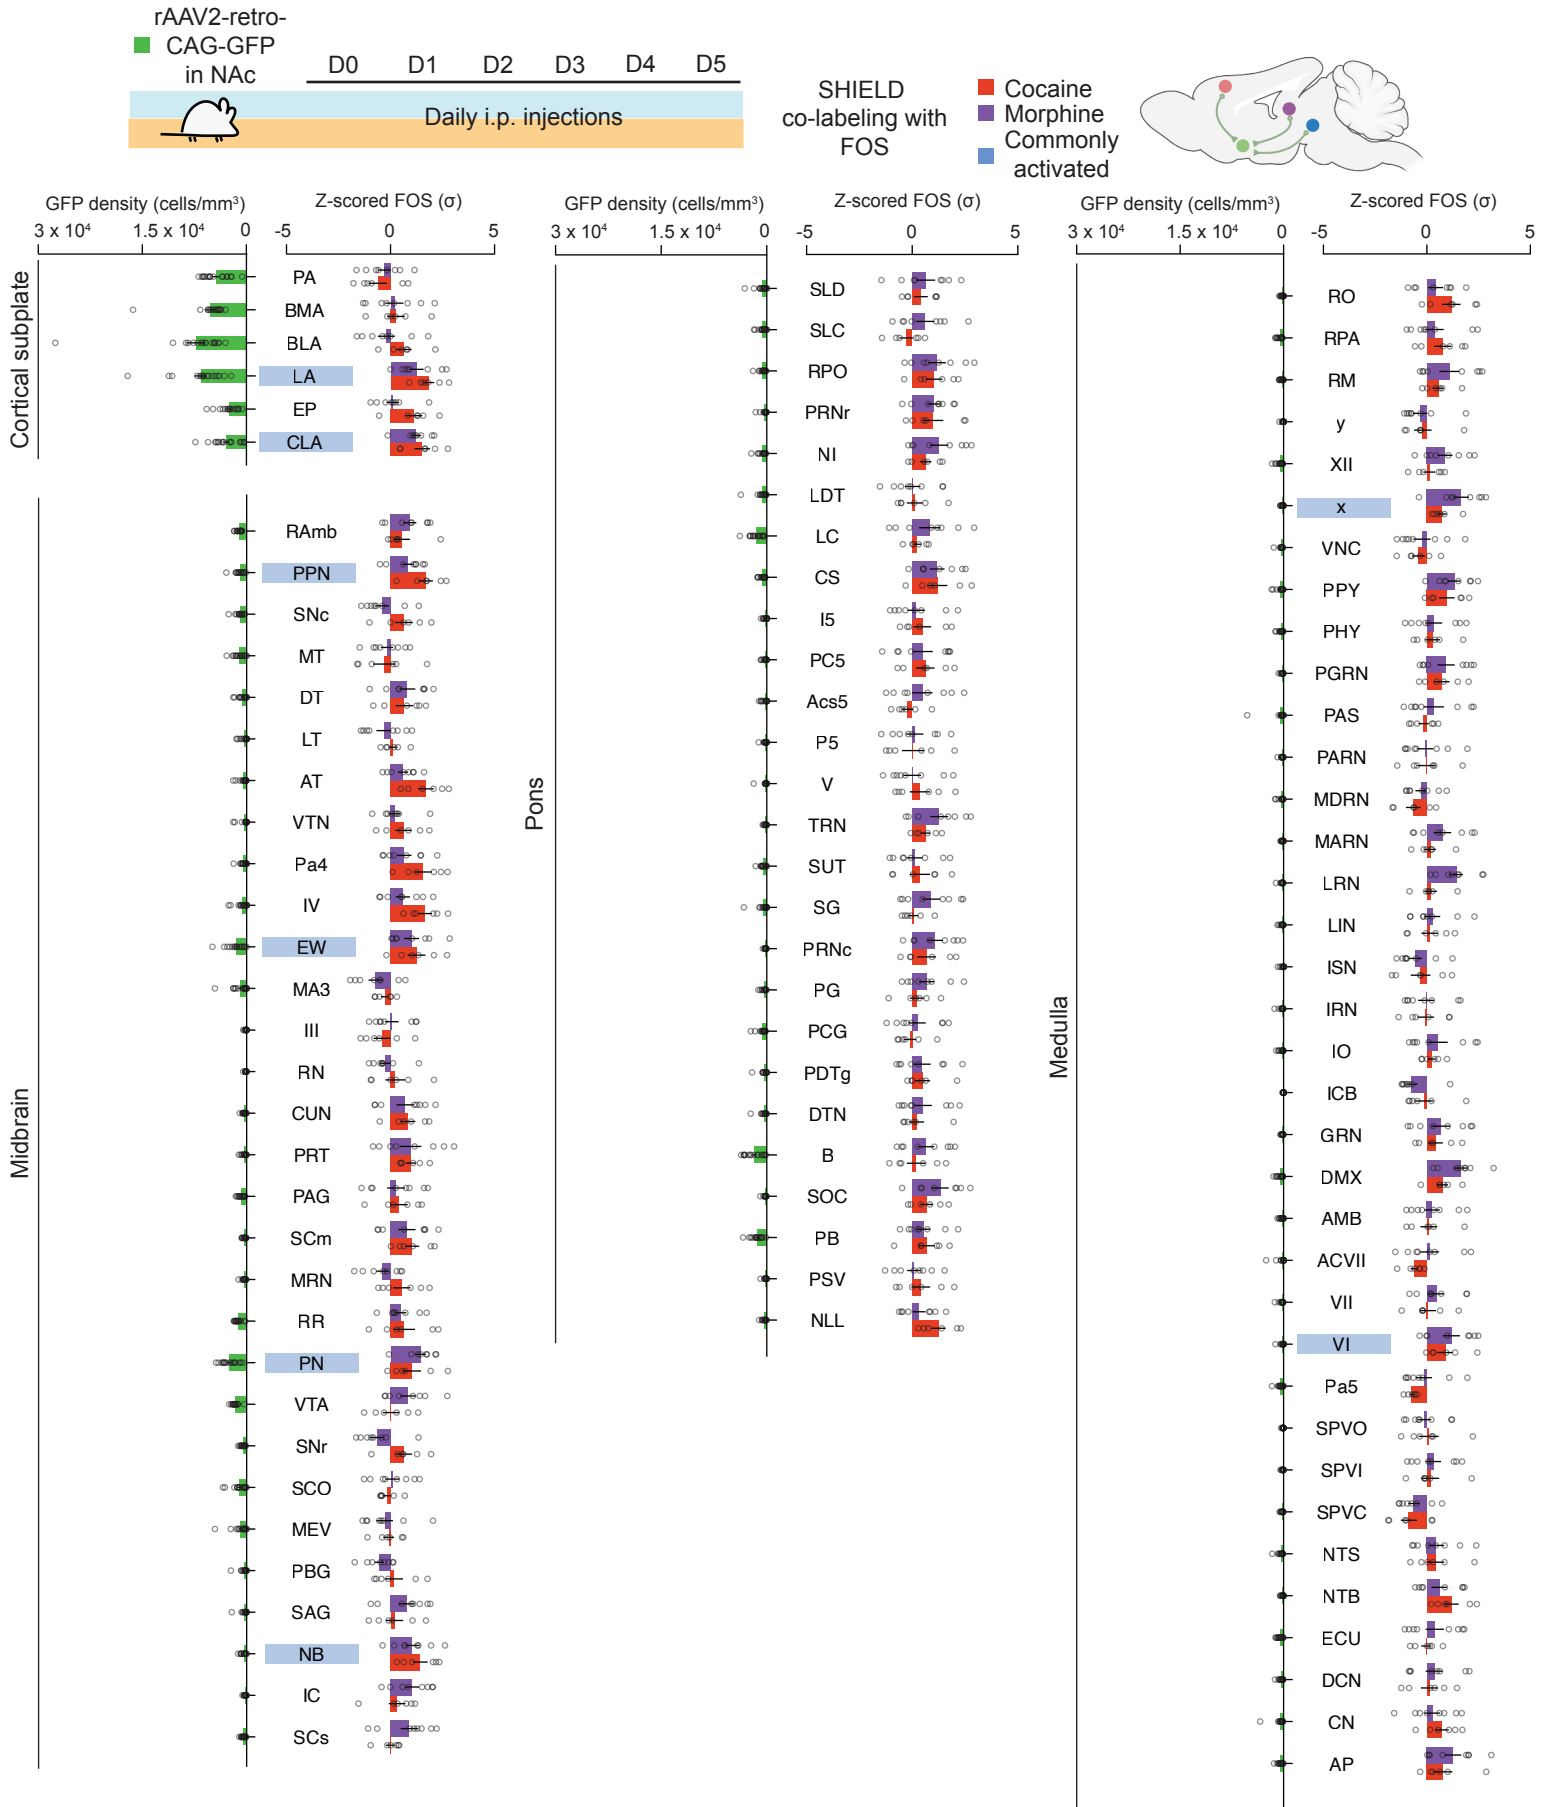



# Figure S9

## a Distribution of GFP+ brain areas

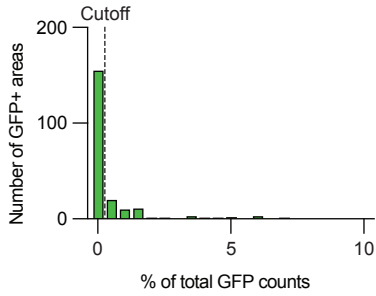

## b Cortical projections to NAc

■ Cocaine  
■ Morphine  
■ Commonly activated

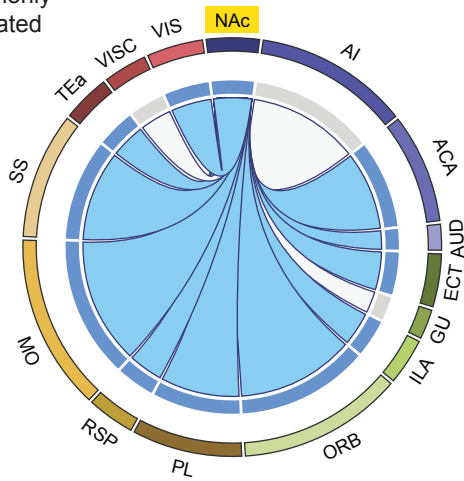

## c Subcortical projections to NAc

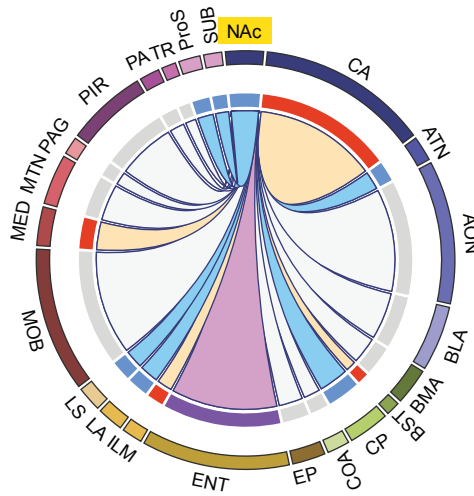

## d Retrograde chemogenetic activation of NAc-projecting neurons

NAc: AAVrg-hSyn-DIO-hM3D(Gq)  
 Higher-order nodes: AAV5-hSyn-Cre

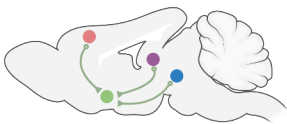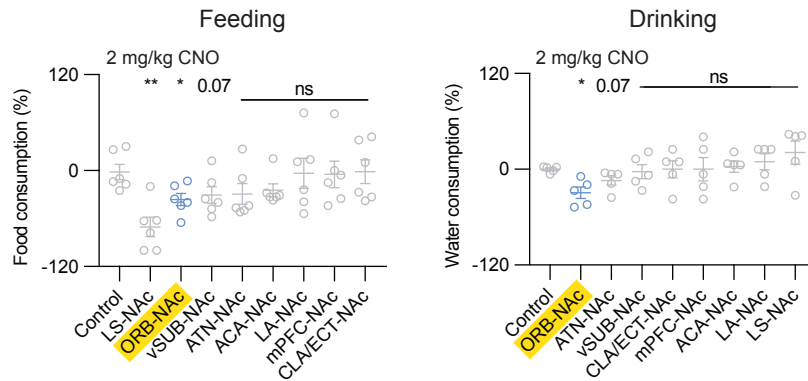

Supplement: NIHPP2023.09.03.556059v1-supplement-1.pdf [file NIHPP2023.09.03.556059v1-supplement-1.pdf]
